# Supplementary material for: Contrastive Functional Connectivity Defines Neurophysiology-informed Symptom Dimensions in Major Depression
Source: PubMed Central journal article supplement — bioRxiv. 2024 Oct 7:2024.10.04.616707. Preprint. [Version 1] doi: 10.1101/2024.10.04.616707 (PMC11482755; doi:10.1101/2024.10.04.616707), 2024-10-07
Supplement: NIHPP2024.10.04.616707v1-supplement-1.pdf [file NIHPP2024.10.04.616707v1-supplement-1.pdf]

## Supplementary Materials

**Table S1.** Distribution of demographic information and clinical measurements of EMBARC MDD patients included in our study (N=233).

| Item                                                               | Sub-scales           | Mean±Std     | Range |
|--------------------------------------------------------------------|----------------------|--------------|-------|
| Demographics                                                       | Age                  | 36.3±18.5    | 18-65 |
|                                                                    | Gender               | 67.4% Female |       |
| HAMD (Hamilton Depression Rating Scale)                            | 17-item total score  | 18.4±4.2     | 7-32  |
| ASRM (Altman Self-Rating Mania Scale)                              | /                    | 1.5±1.9      | 0-11  |
| AAQ (Anger Attack Questionnaire)                                   | /                    | 0.4±0.5      | 0-1   |
| CTQ (Childhood Trauma Questionnaire)                               | emotional abuse      | 13.1±5.6     | 5-25  |
|                                                                    | emotional neglect    | 13.5±4.9     | 5-24  |
|                                                                    | physical abuse       | 8.3±4.3      | 5-25  |
|                                                                    | physical neglect     | 8.3±3.5      | 5-20  |
|                                                                    | sexual abuse         | 8.3±5.6      | 5-25  |
| CAST (Concise Associated Symptoms Tracking)                        | /                    | 30.3±9.2     | 7-57  |
| CH RTP (Concise Health Risk Tracking-Self Report)                  | propensity           | 26.4±8.1     | 3-49  |
|                                                                    | risk                 | 5.2±2.4      | 0-10  |
| MASQ (Mood and Anxiety Symptoms Questionnaire)                     | anxious arousal      | 17.4±5.4     | 10-35 |
|                                                                    | anhedonic depression | 43.7±5.3     | 16-50 |
|                                                                    | general distress     | 32.1±7.9     | 13-50 |
| MDQ (Mood Disorder Questionnaire)                                  | /                    | 4.1±3.0      | 0-13  |
| NEO-FFI (NEO-Five Factor Inventory)                                | agreeableness        | 32.0±7.0     | 7-47  |
|                                                                    | conscientiousness    | 23.6±8.3     | 3-44  |
|                                                                    | extraversion         | 19.4±7.6     | 4-43  |
|                                                                    | neuroticism          | 35.2±6.3     | 15-48 |
|                                                                    | openness             | 31.8±7.5     | 14-48 |
| QIDS (Quick Inventory of Depressive Symptomatology)                | /                    | 16.8±2.8     | 10-26 |
| SCQ (Self-Administered Comorbidity Questionnaire)                  | /                    | 1.9±2.7      | 0-17  |
| SHAPS (Snaith–Hamilton Pleasure Scale)                             | continuous score     | 33.5±5.4     | 18-51 |
| SAS (Social Adjustment Scale)                                      | overall mean score   | 2.6±0.6      | 1.1-4 |
| SAPAS (Standardised Assessment of Personality – Abbreviated Scale) | /                    | 3.9±1.4      | 1-8   |

**Table S2.** Demographic information of healthy controls included in our study.

|          | UCLA CNP<br>(N=83) | LEMON<br>(N=103) | AOMIC<br>(N=72) | EMBARC<br>(N=27) | Total<br>(N=285) |
|----------|--------------------|------------------|-----------------|------------------|------------------|
| Age      | 35.31±8.26         | 45.22±20.72      | 21.96±1.86      | 42.75±12.84      | 36.73±16.48      |
| Female % | 43.3               | 33.0             | 56.9            | 60.8             | 46               |

**Table S3.** Cognitive and emotional tasks included in our study and their measurements.

| <b>Task</b>               | <b>Item</b>                                                                                       | <b>Measurements</b>                                                  |
|---------------------------|---------------------------------------------------------------------------------------------------|----------------------------------------------------------------------|
| A not B task              | Overall accuracy                                                                                  | Working memory                                                       |
| Choice reaction time task | Overall reaction time                                                                             | Interference and post-error adjustments                              |
| Flanker task              | Accuracy difference between incongruent and congruent trials                                      | Cognitive control, conflict monitoring                               |
|                           | Reaction time difference between incongruent and congruent trials                                 | Cognitive flexibility, conflict processing speed                     |
| Word fluency task         | Total valid number of words                                                                       | Psychomotor slowing                                                  |
| Probabilistic reward task | Overall response bias                                                                             | Reward learning                                                      |
| Emotion conflict task     | Reaction time difference between incongruent-following and congruent-following incongruent trials | Resolution and adjustment behavior in response to emotional conflict |

**Table S4.** Chi-square test between the population distribution in high/low FC dimension score groups and remission rates within different treatment groups (sertraline and placebo). Remission is defined as HAM-D score  $\leq 7$  at week 8. For each dimension, high/low groups are divided by the median FC dimension score from all population. All p-values  $> 0.05$ , indicating that there is no significant relation between high/low dimension scores and remission.

| Internalizing-externalizing symptoms dimension |           |               |           |               |            |      |
|------------------------------------------------|-----------|---------------|-----------|---------------|------------|------|
| Sertraline                                     | Observed  |               | Expected  |               | Statistics |      |
|                                                | Remission | Non-remission | Remission | Non-remission | $\chi^2$   | 1.20 |
| High group                                     | 14        | 42            | 17.19     | 38.81         | p          | 0.27 |
| Low group                                      | 21        | 37            | 17.81     | 40.19         | samples    | 114  |
| Placebo                                        | Observed  |               | Expected  |               | Statistics |      |
|                                                | Remission | Non-remission | Remission | Non-remission | $\chi^2$   | 0.00 |
| High group                                     | 16        | 45            | 15.89     | 45.11         | p          | 1.00 |
| Low group                                      | 15        | 43            | 15.11     | 42.89         | samples    | 119  |
| Depression-protective personality dimension    |           |               |           |               |            |      |
| Sertraline                                     | Observed  |               | Expected  |               | Statistics |      |
|                                                | Remission | Non-remission | Remission | Non-remission | $\chi^2$   | 0.71 |
| High group                                     | 21        | 39            | 18.42     | 41.58         | p          | 0.40 |
| Low group                                      | 14        | 40            | 16.58     | 37.42         | samples    | 114  |
| Placebo                                        | Observed  |               | Expected  |               | Statistics |      |
|                                                | Remission | Non-remission | Remission | Non-remission | $\chi^2$   | 0.48 |
| High group                                     | 17        | 40            | 14.85     | 42.15         | p          | 0.49 |
| Low group                                      | 14        | 48            | 16.15     | 45.85         | samples    | 119  |

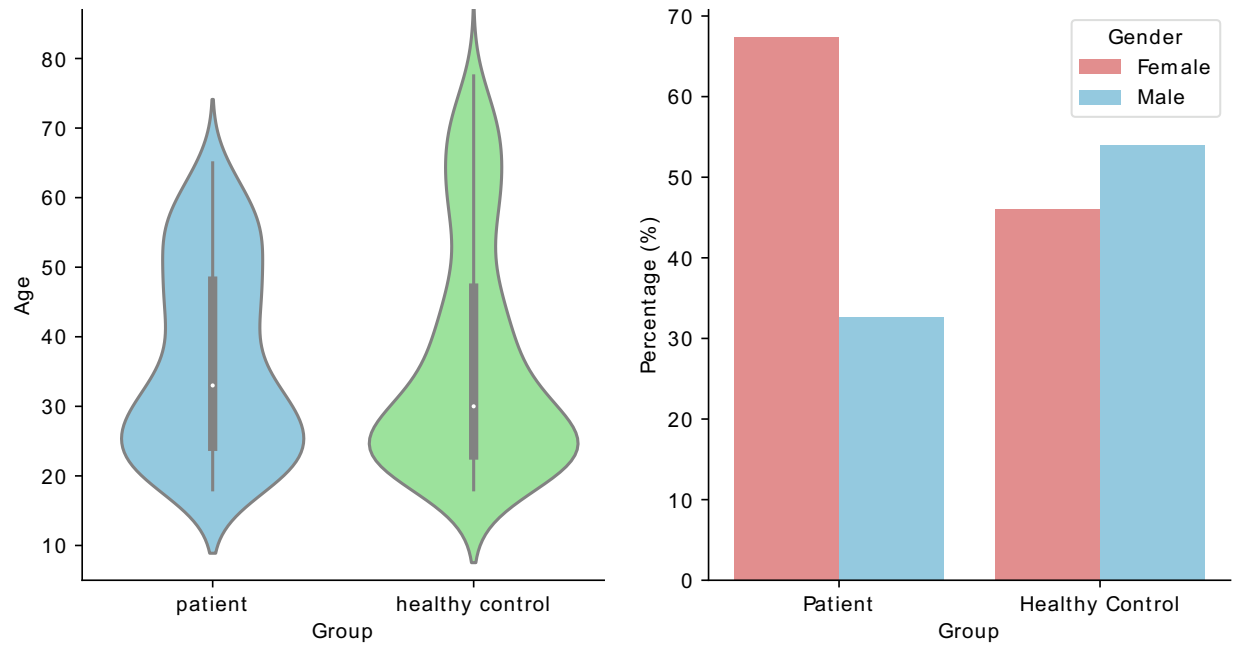

**Figure S1.** Demographic information comparison between patient (N=233) and healthy control groups (N=285). The age distribution of the patient population and the healthy population was matched, with a Kolmogorov-Smirnov test yielding a p-value of 0.052.

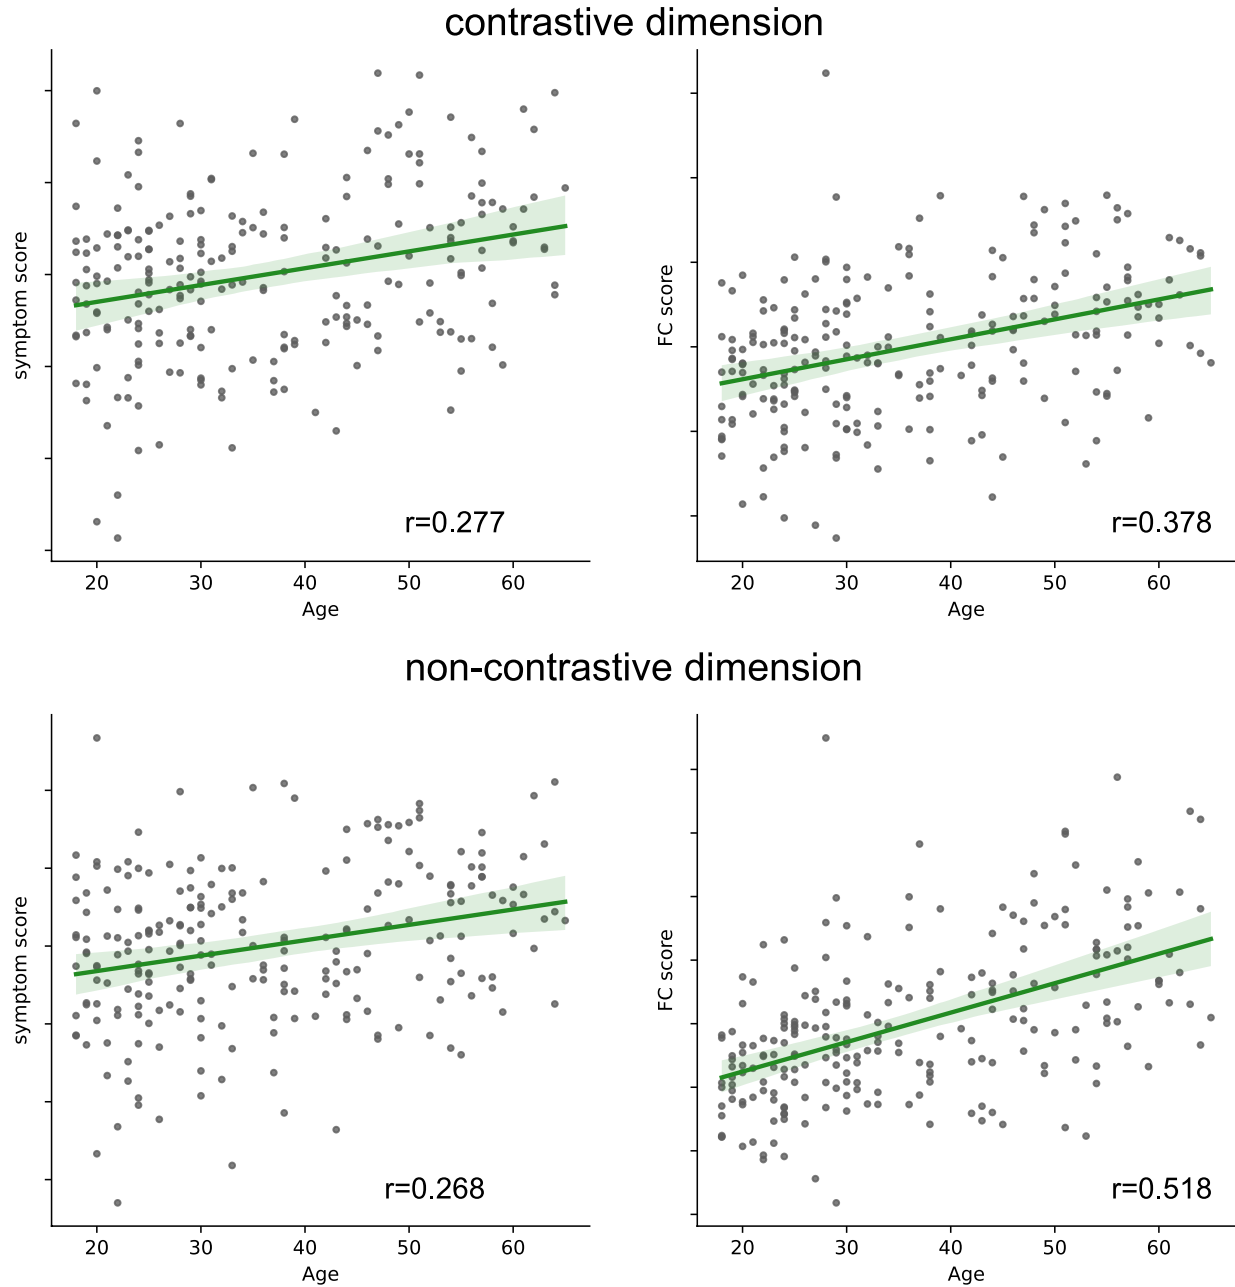

**Figure S2.** Comparison of the age-correlation of the best symptom/FC dimensions derived from cPCA and regular PCA components. Contrastive learning marginally reduced the age-related component in its FC dimension, with a Fisher's z test showing near-significant results ( $p = 0.059$ ).

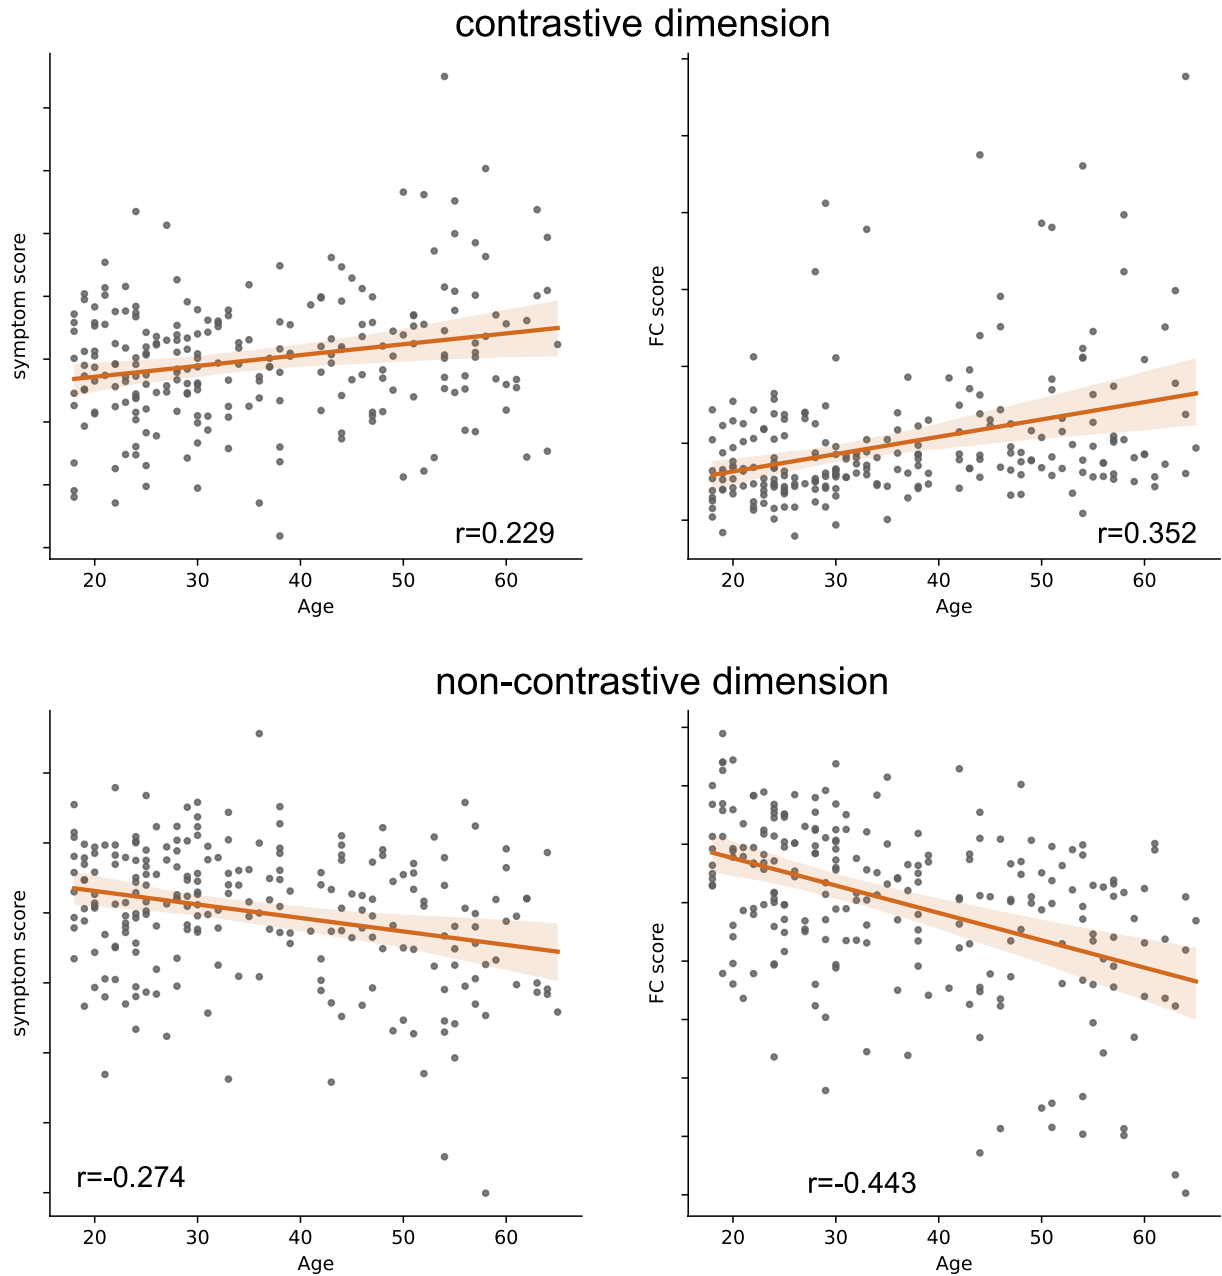

**Figure S3.** Comparison of the age correlation in the second-best symptom/FC dimensions derived from cPCA and regular PCA components. Contrastive learning reduced the age-related component in both symptom and FC dimensions, but the reduction was not statistically significant ( $p > 0.1$ ).

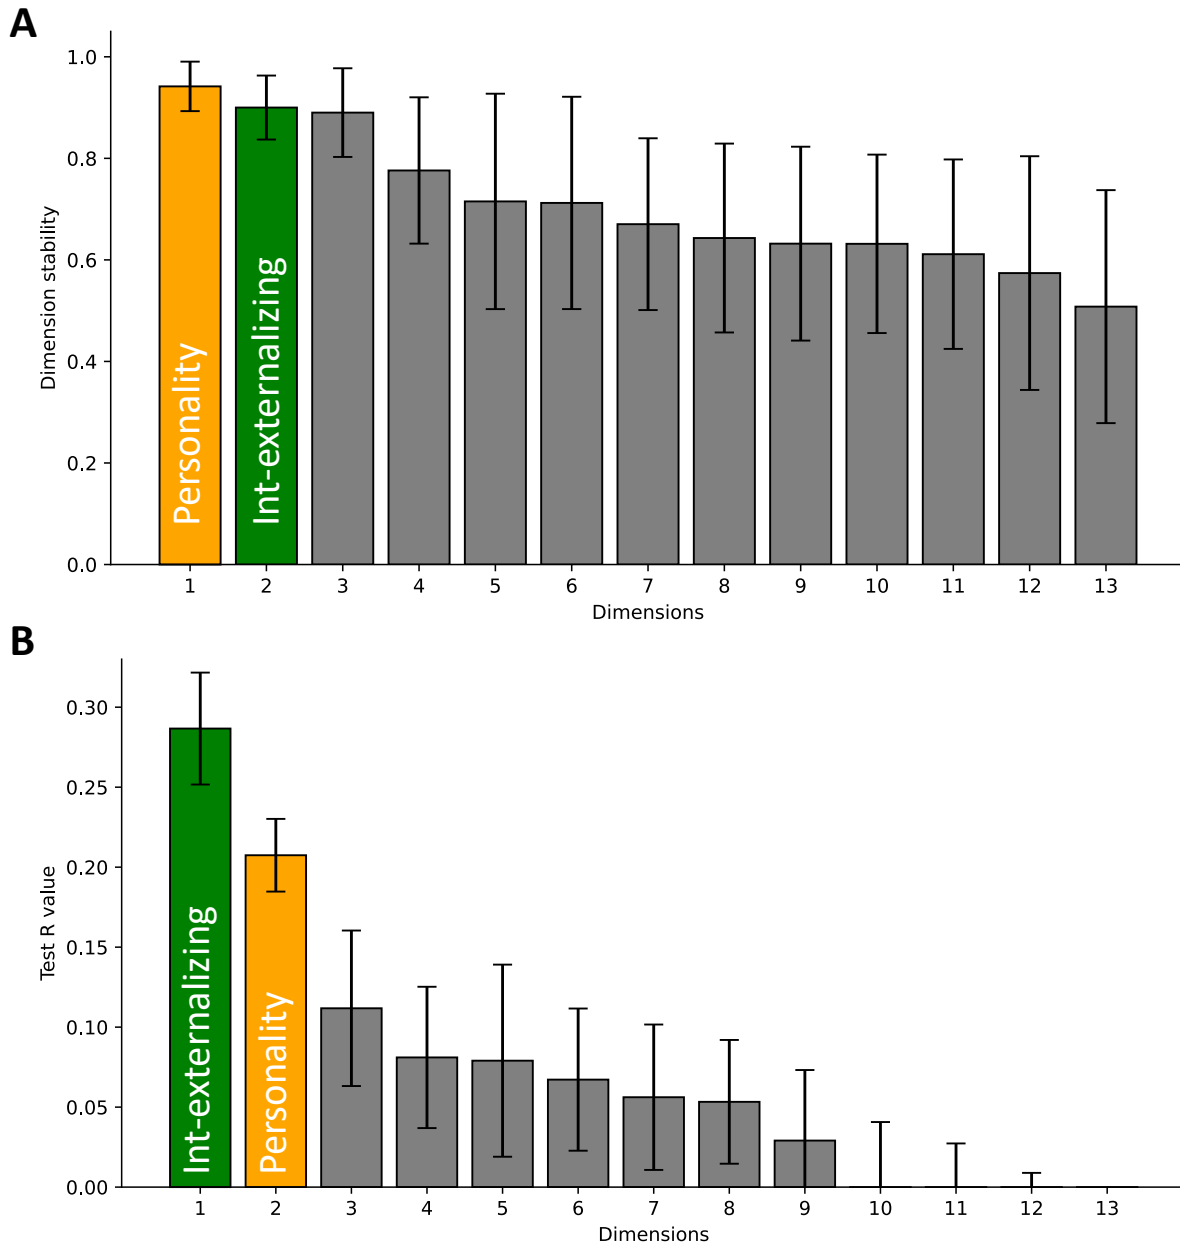

**Figure S4.** (A) Overall dimension stability for all 13 dimensions given by sCCA, measured by the average of the cosine similarity between each pair of FC dimensions and each pair of symptom dimensions from 10×10 folds. All dimensions have an overall stability over 0.5. (B) For the 13 dimensions, only two dimensions survived FDR correction in permutation test, shown in colors. The raw p-values are:  $p < 0.001$  for internalizing-externalizing symptoms dimension, and  $p = 0.001$  for depression-protective personality dimension.
